# Supplementary material for: Characterization of Oxygen Nanobubbles and In Vitro Evaluation of Retinal Cells in Hypoxia
Source: PubMed Central journal article supplement — Transl Vis Sci Technol. 2023 Feb 10;12(2):16. doi: 10.1167/tvst.12.2.16 (PMC9927786; doi:10.1167/tvst.12.2.16), 2023-02-10
Supplement: tvst-12-2-16_s001.pdf [file tvst-12-2-16_s001.pdf]

## **Characterization of Oxygen Nanobubbles and in vitro evaluation of retinal cells under hypoxic conditions**

Victoria Messerschmidt<sup>1</sup>, Wen Ren<sup>1,2</sup>, Michael Tsipursky<sup>3,4</sup>, Joseph Irudayaraj<sup>1,2,4,5</sup>

<sup>1</sup> Biomedical Research Centre (BRC), Mills Breast Cancer Institute, Carle Foundation Hospital, Urbana, Illinois 61801, United States

<sup>2</sup> Department of Bioengineering, University of Illinois at Urbana-Champaign, Urbana, Illinois 61801, United States

<sup>3</sup> Vitreo-Retinal Surgery, Ophthalmology Department, Carle Foundation Hospital, Champaign, Illinois 61802, United States

<sup>4</sup> Carle-Illinois College of Medicine, Champaign, Illinois 61820, United States

<sup>5</sup> Beckman Institute; Holonyak Micro and Nanotechnology Laboratory; Carl Woese Institute for Genomic Biology, University of Illinois at Urbana-Champaign, Urbana, Illinois 61801

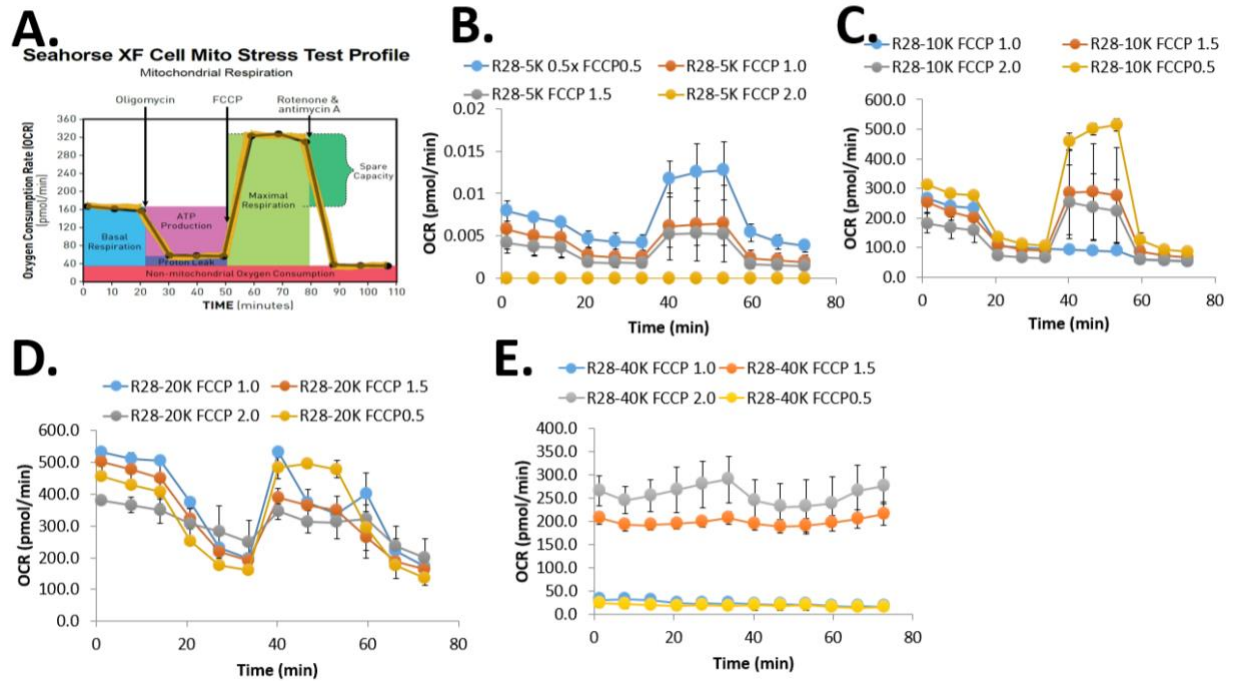

**Figure S1: Mitochondrial Stress Test R28 Optimization.** (A) The typical mitochondrial stress test profile. R28 cells were seeded at (B) 5,000 cells/well, (C) 10,000 cells/well, (D) 20,000 cells/well, or (E) 40,000 cells/well and exposed to 6 hours of hypoxia followed by treatment of 0.5, 1.0, 1.5, or 2.0  $\mu\text{M}$  of carbonyl cyanide-4 (trifluoromethoxy) phenylhydrazine (FCCP). Ideal Mitochondrial stress profiles have starting OCR between 100-200 pMol/min. The highest maximal respiration peak at the determined cell concentration defines the FCCP concentration. Optimization showed that a cell concentration of 5,000 cells/well matched the typical profile, and the FCCP concentration of 1.5  $\mu\text{M}$  showed the largest maximal respiration for R28 cells.

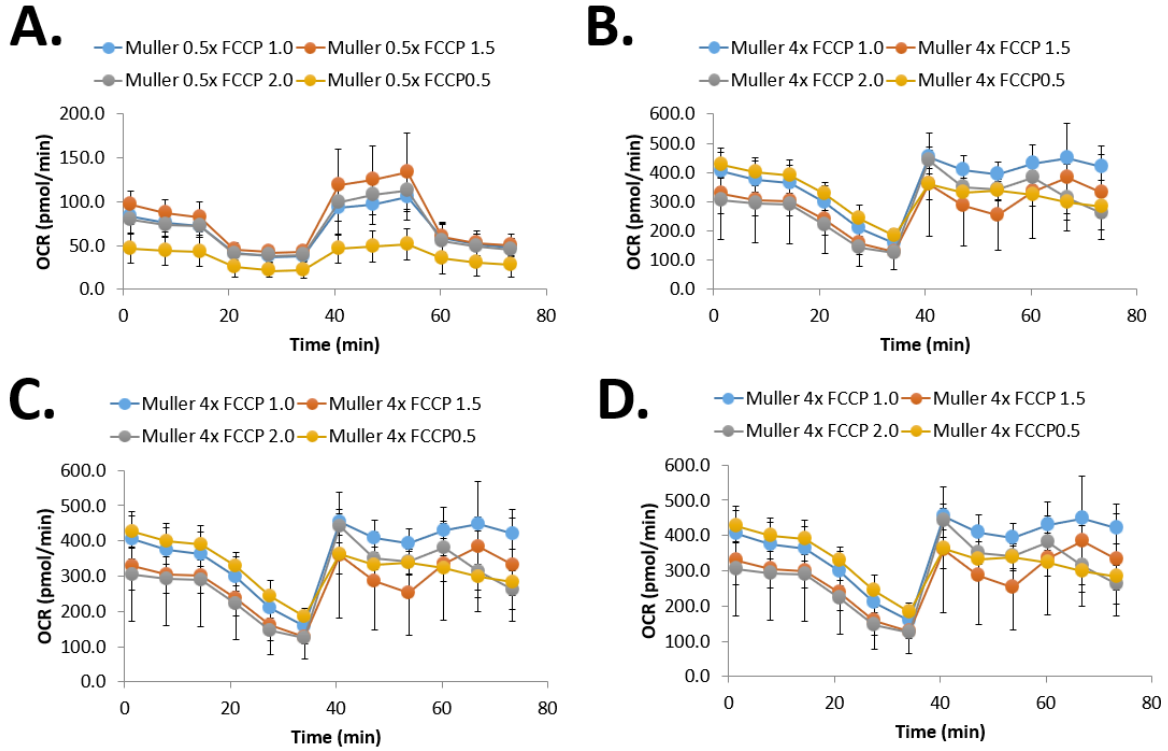

**Figure S2: Mitochondrial Stress Test Muller Optimization.** Muller cells were seeded at (A) 5,000 cells/well, (B) 10,000 cells/well, (C) 20,000 cells/well, or (D) 40,000 cells/well and exposed to 6 hours of hypoxia followed by treatment of 0.5, 1.0, 1.5, or 2.0  $\mu\text{M}$  of carbonyl cyanide-4 (trifluoromethoxy) phenylhydrazine (FCCP). Ideal Mitochondrial stress profiles have starting OCR between 100-200 pMol/min. The highest maximal respiration peak at the determined cell concentration defines the FCCP concentration. Optimization showed that a cell concentration of 5,000 cells/well matched the typical profile, and the FCCP concentration of 1.5  $\mu\text{M}$  showed the largest maximal respiration for Muller cells.

**Table S1: Body Weight Change.** Days post injection (dpi). Group 1: Saline injection. Group 2: ONB injection.

| <b>Subject Name</b> | <b>Group</b> | <b>Baseline</b> | <b>1 dpi</b> | <b>7 dpi</b> |
|---------------------|--------------|-----------------|--------------|--------------|
| 101                 | 1            | 3.21            | 3.16         | 3.25         |
| 102                 | 1            | 2.98            | 2.98         | 3.11         |
| 103                 | 1            | 3.06            | 3.03         | 3.09         |
| 104                 | 2            | 2.98            | 2.99         | 3.06         |
| 105                 | 2            | 3.12            | 3.15         | 3.14         |
| 106                 | 2            | 3.10            | 3.11         | 3.21         |

**Table S2: Clinical Signs Observed.** Days post injection (dpi). Group 1: Saline injection. Group 2: ONB injection. No abnormalities detected (NAD).

| <b>Subject Name</b> | <b>Group</b> | <b>0 dpi</b> | <b>1 dpi</b> | <b>2 dpi</b> | <b>3 dpi</b> | <b>4 dpi</b> | <b>5 dpi</b> | <b>6 dpi</b> |
|---------------------|--------------|--------------|--------------|--------------|--------------|--------------|--------------|--------------|
| 101                 | 1            | NAD          |
| 102                 | 1            | NAD          |
| 103                 | 1            | NAD          |
| 104                 | 2            | NAD          |
| 105                 | 2            | NAD          |
| 106                 | 2            | NAD          |



|     |    |   |        |       |    |   |   |   |   |   |   |   |   |   |   |   |   |   |   |   |   |   |   |   |   |   |
|-----|----|---|--------|-------|----|---|---|---|---|---|---|---|---|---|---|---|---|---|---|---|---|---|---|---|---|---|
|     | OS | 1 | Saline | Day 7 | 13 | 0 | 0 | 0 | 0 | 0 | 0 | 0 | 0 | 0 | 0 | 0 | 0 | 0 | 0 | 0 | 0 | 0 | 0 | 0 | 0 | 0 |
| 104 | OD | 2 | ONB    | Day 7 | 12 | 0 | 0 | 0 | 0 | 0 | 0 | 0 | 0 | 0 | 0 | 0 | 0 | 0 | 0 | 0 | 0 | 0 | 0 | 0 | 0 | 0 |
|     | OS | 2 | ONB    | Day 7 | 13 | 0 | 0 | 0 | 0 | 0 | 0 | 0 | 0 | 0 | 0 | 0 | 0 | 0 | 0 | 0 | 0 | 0 | 0 | 0 | 0 | 0 |
| 105 | OD | 2 | ONB    | Day 7 | 14 | 0 | 0 | 0 | 0 | 0 | 0 | 0 | 0 | 0 | 0 | 0 | 0 | 0 | 0 | 0 | 0 | 0 | 0 | 0 | 0 | 0 |
|     | OS | 2 | ONB    | Day 7 | 14 | 0 | 0 | 0 | 0 | 0 | 0 | 0 | 0 | 0 | 0 | 0 | 0 | 0 | 0 | 0 | 0 | 0 | 0 | 0 | 0 | 0 |
| 106 | OD | 2 | ONB    | Day 7 | 10 | 0 | 0 | 0 | 0 | 0 | 0 | 0 | 0 | 0 | 0 | 0 | 0 | 0 | 0 | 0 | 0 | 0 | 0 | 0 | 0 | 0 |
|     | OS | 2 | ONB    | Day 7 | 10 | 0 | 0 | 0 | 0 | 0 | 0 | 0 | 0 | 0 | 0 | 0 | 0 | 0 | 0 | 0 | 0 | 0 | 0 | 0 | 0 | 0 |

CC: Conjunctival congestion; CS Conjunctival swelling; CD: Conjunctival discharge; PA: Corneal vascular pannus; CO: Corneal opacity; CA: Corneal opacity area; KP: Inflammatory KP; AC: Aqueous cell; HY: Hypopyon; AF: Aqueous flare; FS: Fibrin strands; IH: Iris hyperemia; IE: Iris exfoliation; IS: Iris synechia; ALC: Anterior lens capsule deposit; PCL: Posterior lens capsule deposit; LO: Lens opacity; VC: Vitreous cell; VH: Vitreous haze; RV: Retinal vasculitis; PP: Papillitis; Total clinical score: Sum of findings.
